# Supplementary material for: Systematic Investigation of the Effects of Multiple SV40 Nuclear Localization Signal Fusion on the Genome Editing Activity of Purified SpCas9
Source: MDPI journal article supplement (doi:10.3390/bioengineering9020083), 2022-02-21
Supplement: s1 [file s1]

## **Systematic Investigation of the Effects of Multiple SV40 Nuclear Localization Signal Fusion on the Genome Editing Activity of Purified SpCas9**

Sailan Shui<sup>1,2,3</sup>, Shao-jie Wang<sup>1,2</sup>, Jia Liu<sup>1,\*</sup>

<sup>1</sup>Shanghai Institute for Advanced Immunochemical Studies and School of Life Science and Technology,  
ShanghaiTech University, Shanghai, 201210, China

<sup>2</sup>Contributed equally to this work

<sup>3</sup>Current address: Laboratory of Protein Design and Immunoengineering (LPDI) - STI - EPFL, Lausanne,  
Switzerland; Swiss Institute of Bioinformatics (SIB), Lausanne CH-1015, Switzerland

\*Correspondence should be addressed to J.L. (liujia@shanghaitech.edu.cn)

## Supplemented Figures

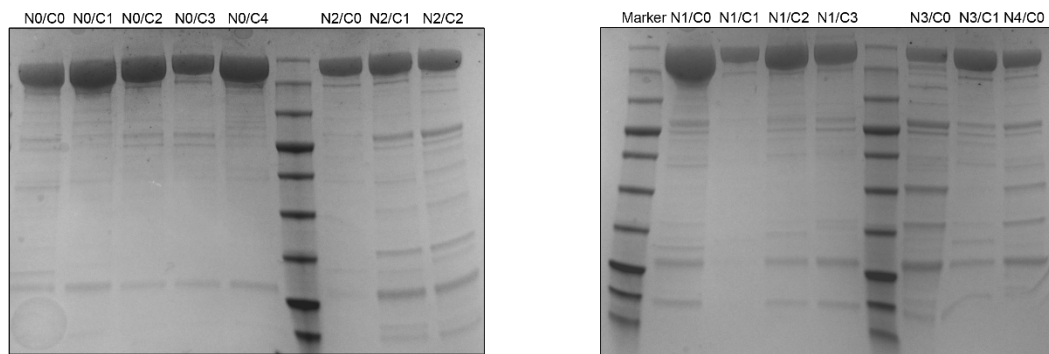

**Figure S1. SDS-PAGE of purified SpCas9 proteins in this study.**

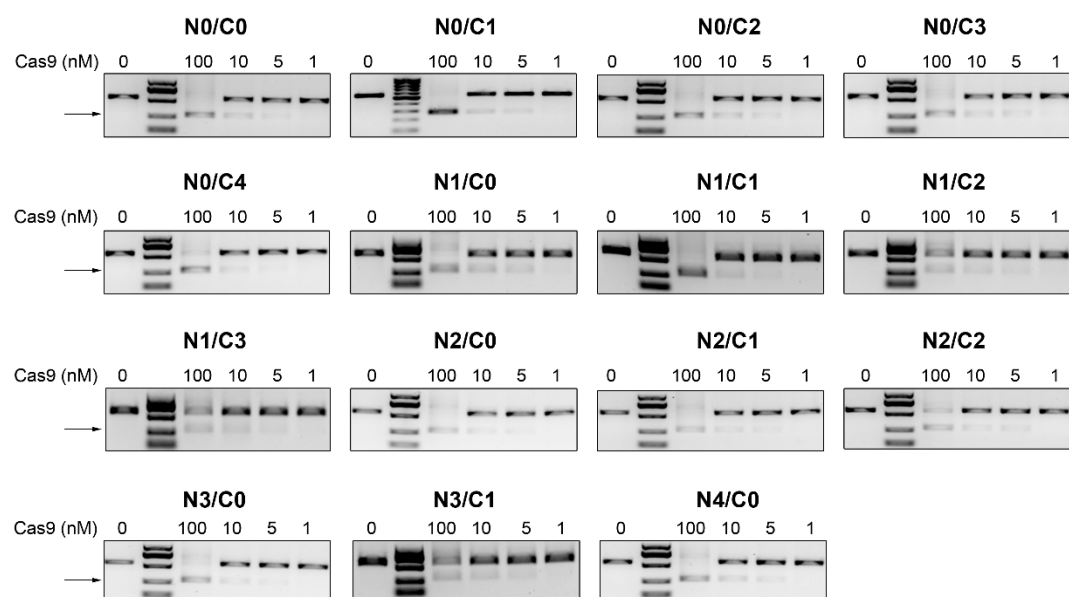

**Figure S2. Evaluation of the *in vitro* activity of multi-NLS SpCas9 variants, determined by 1% agarose gel electrophoresis.** Cleaved substrate DNA are indicated by arrows.

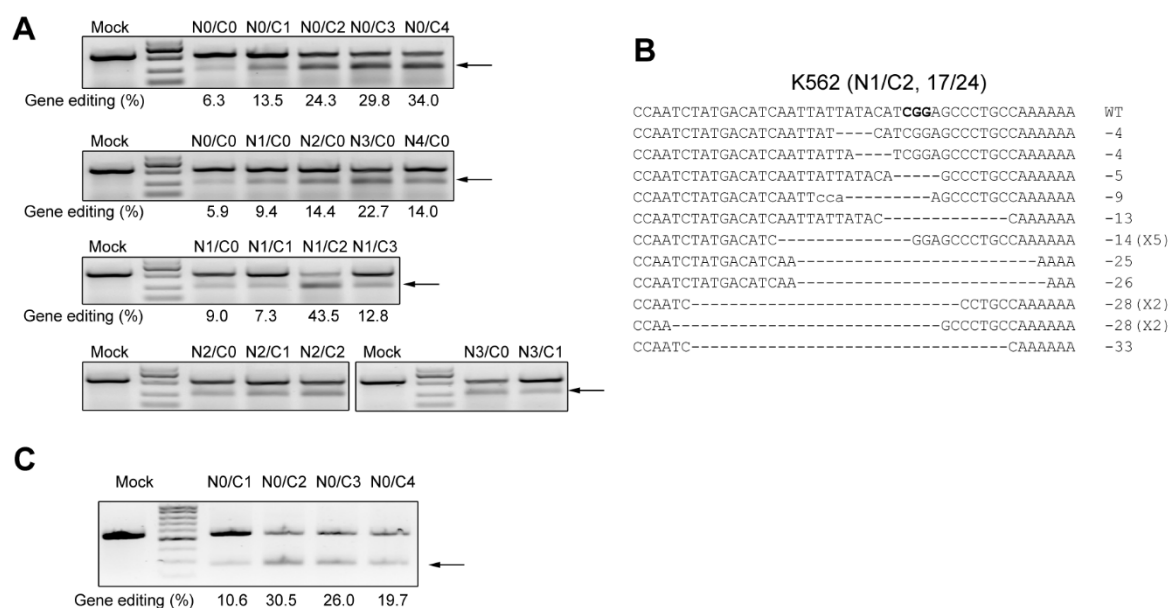

**Figure S3. Evaluation of the genome-editing activity of nucleofected multi-NLS SpCas9 proteins in K562 (A-B) and Jurkat (C) cells.** (A) Representative images of T7E1 analysis of the genome-editing activity of SpCas9 variants in K562 (Related to Figure 3A). The cleavage product is indicated by arrows. (B) Validation of the modified genomic locus by Sanger sequencing (Related to Figure 3A). (C) Representative images of T7E1 analysis of the genome-editing activity of SpCas9 variants in Jurkat (Related to Figure 3B). The cleavage product is indicated by arrows. T7E1 assay is performed with 1% agarose gel electrophoresis unless noted otherwise.

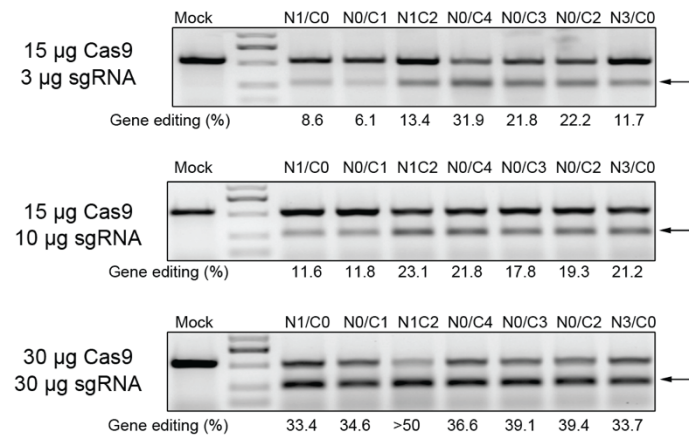

**Figure S4 (related to Figure 4A). The effects of multi-NLS on SpCas9 proteins at different dosage, determined by T7E1 assay on 1% agarose gel.**

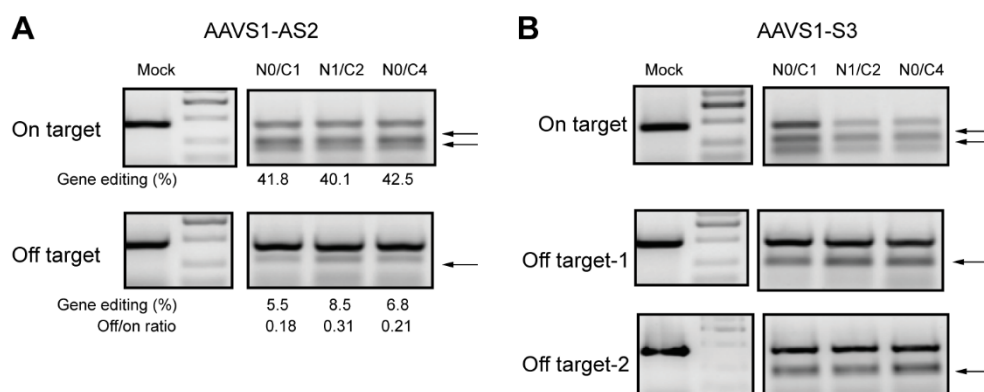

**Figure S5 (related to Figure 4B). The effects of multi-NLS on the specificity of SpCas9 variants, determined by T7E1 assay on 1% agarose gel. (A) On-target and off-target activities of sgRNA AAVS1-AS2. (B) On-target and off-target activities of sgRNA AAVS1-S3. The arrows indicate cleavage products.**

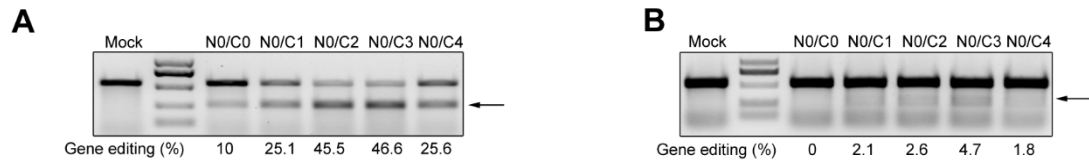

**Figure S6 (related to Figure 5). Representative images of the T7E1 results of gene-modified hNPCs (A) and hDFs (B) with multi-NLS SpCas9 proteins.** Arrows indicate cleavage product. T7E1 results are resolved on 1% agarose gel.

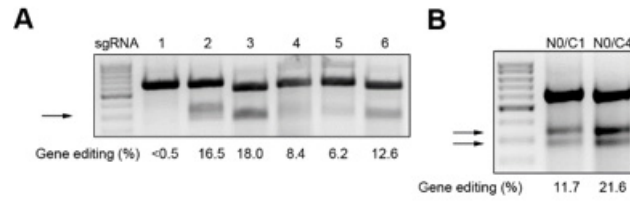

**Figure S7 (related to Figure 6). Genome editing of mouse embryos using microinjected N0/C1 and N0/C4 SpCas9 proteins.** (A) T7E1 analyses of PTEN-targeting sgRNA screening in mouse Hepa 1-6 cell line. (B) T7E1 analyses of pooled 2-cell embryos treated with N0/C1 and N0/C4 SpCas9 proteins respectively. Arrows indicate cleavage product. T7E1 results are resolved on 1% agarose gel.

## Uncropped western blot (related to Figure 3C-D)

### Figure 3C

HA

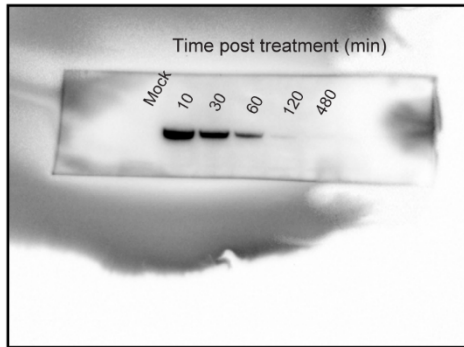

Lamin B1

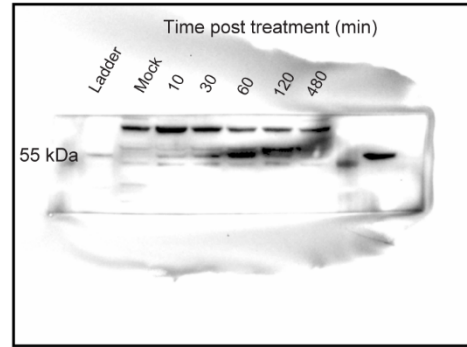

### Figure 3D

HA

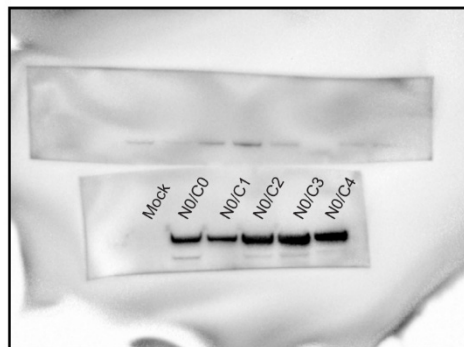

Lamin B1

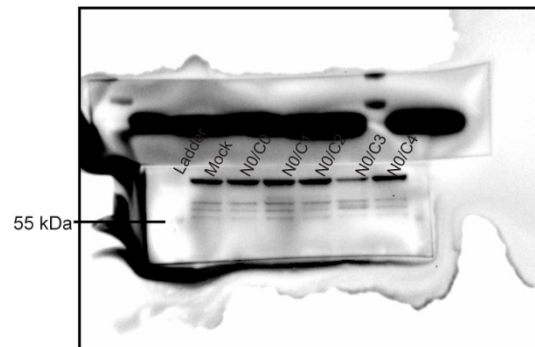

## Supplementary Tables

**Table S1. sgRNA used in this study**

| <b>Name</b>          | <b>Target gene</b> | <b>Sequence</b>      |
|----------------------|--------------------|----------------------|
| CCR5-sgRNA           | CCR5               | TGACATCAATTATTATACAT |
| 293-Reporter-sgRNA-1 | EGFP               | CAGAATTGATACTGACTGTA |
| 293-Reporter-sgRNA-2 | EGFP               | GATTCAGTCAGTATCAATTC |
| AAVS1-AS2            | AAVS1              | CTCCCTCCCAGGATCCTCTC |
| AAVS1-S3             | AAVS1              | GGGAGGGAGAGCTTGGCAGG |
| EMX1-sgRNA           | EMX1               | GTCACCTCCAATGACTAGGG |
| mouse-pTen-sgRNA-1   | PTEN               | AATATTATTGCTATGGGATT |
| mouse-pTen-sgRNA-2   | PTEN               | ACAATATTGATGATGTAGTA |
| mouse-pTen-sgRNA-3   | PTEN               | ACCGCCAAATTTAACTGCAG |
| mouse-pTen-sgRNA-4   | PTEN               | GCAGCAATTCACTGTAAAGC |
| mouse-pTen-sgRNA-5   | PTEN               | TGTCATCTTCACTTAGCCAT |
| mouse-pTen-sgRNA-6   | PTEN               | CATACCTCTGCAGTTAAATT |

**Table S2. Primers used in this study**

| Name              | Sequence               |
|-------------------|------------------------|
| CCR5-EX-F         | AGGTGAGAGGATTGCTTG     |
| CCR5-EX-R         | AAATGAGAGCTGCAGGTG     |
| CCR5-IN-F         | GAGCCAAGCTCTCCATCTAGT  |
| CCR5-IN-R         | GCCCTGTCAAGAGTTGACAC   |
| AAVS1-EX-F        | AGCCTGAGCGCCTCTCCT     |
| AAVS1-EX-R        | TTGCTTTCTTTGCCTGGA     |
| AAVS1-IN-F        | TGCTTCTCCTCTTGCGAAGT   |
| AAVS1-IN-R        | CGGTTAATGTGGCTCTGGTT   |
| EMX1-EX-F         | AGAGGAGCTAGGATGCAC     |
| EMX1-EX-R         | TGAATTACCCTTGACCCC     |
| EMX1-IN-F         | GGAGCAGCTGGTCAGAGGGG   |
| EMX1-IN-R         | AATCTACCACCCCAGGCTCT   |
| AAVS1-AS2-OT-EX-F | CAGGCTCCTTGTTCTTCTGG   |
| AAVS1-AS2-OT-EX-R | AAGCCATGGTCTGCTTCACT   |
| AAVS1-AS2-OT-IN-F | TGCAGGAAAAAGTTGCAGTG   |
| AAVS1-AS2-OT-IN-R | GGCCAAACTGGAGAGACAGA   |
| AAVS1-S3-OT1-EX-F | CAGCTTCCTGGAAAGACCTG   |
| AAVS1-S3-OT1-EX-R | GGTTTTGGCCTGACTGTGTT   |
| AAVS1-S3-OT1-IN-F | TATCTCCTCTCCCCCTGCTT   |
| AAVS1-S3-OT1-IN-R | GAGCTGCCTGACTTCCCTAA   |
| AAVS1-S3-OT2-EX-F | AGCTTCTGCAACTGGTGGTT   |
| AAVS1-S3-OT2-EX-R | AGTTGCTGGTAGGAGGCTGA   |
| AAVS1-S3-OT2-IN-F | GGATGAGAGAGCTGGTTTGC   |
| AAVS1-S3-OT2-IN-R | AGGCTTCTCTTCCCTCGTTC   |
| EMX1-EX-F         | TTGAGATGGCTGTTCAAGAG   |
| EMX1-EX-R         | TTGAGACATGGGGATAGAATCA |
| EMX1-IN-F         | GTGGGGAGATTTGCATCTGT   |
| EMX1-IN-R         | CAATGGGAAGGACAGCTTCT   |
| pTen-1/2-EX-F     | CCAGAATATGTAGGCGGAGG   |
| pTen-1/2-EX-R     | GTGGGCCTTGAGAAACACTT   |
| pTen-1/2-IN-F     | GAGCCTCAGTCGCGTATTCT   |
| pTen-1/2-IN-R     | CAAGCCAGAGAATAACCTGG   |
| pTen-3/6-EX-F     | AACATGTATGTTTTAAGTAA   |
| pTen-3/6-EX-R     | TGTACATTTAAAGCTAAGTG   |
| pTen-3/6-IN-F     | GCATGCATGCGTTTAACTTT   |
| pTen-3/6-IN-R     | AGCGCTAGCTGTCCCACACC   |
| pTen-4/5-EX-F     | CAAGTCACTGGGTAAATTTA   |
| pTen-4/5-EX-R     | CATGCCACTAATTCAACAGT   |
| pTen-4/5-IN-F     | CCATGTCTAATGAATGCATT   |
| pTen-4/5-IN-R     | CAGTTCTCAAAGCATCACAC   |

|                   |                        |
|-------------------|------------------------|
| Mycoplasma test-F | GGCGAATGGGTGAGTAACACG  |
| Mycoplasma test-R | CGGATAACGCTTGCGACCTATG |

## Supplementary Methods

### 1. Sequences of Cas9 proteins

#### SpyCas9 core sequence

MDKKYSIGLDIGTNSVGWAVITDEYKVPSKKFKVLGNTDRHSIKKNLIGALLFDSGETAEATRLKR  
TARRRYTRRKNRICYLQEIFSNEMAKVDDSSFFHRLEESFLVEEDKKHERHPIFGNIVDEVAYHEKYP  
TIYHLRKKLVDSTDKADLRLIYLALAHMIKFRGHFLIEGDLNPDNSDVKLFIQLVQTYNQLFEENPI  
NASGVDAKAILSARLSKSRLENLIAQLPGEKKNGLFGNLIASLGLTPNFKSNFDAEDAKLQLSK  
DTYDDDDLNDLLAQIGDQYADLFLAAKNLSDAILLSDILRVNTEITKAPLSASMIKRYDEHHQDLTLL  
KALVRQQLPEKYKEIFFDQSKNGYAGYIDGGASQEEFYKFIKPILEKMDGTEELLVKLNREDLLRK  
QRTFDNGSIPHQIHLGELHAILRRQEDFYFPLKDNREKIEKILTFRIPIYYVGPLARGNSRFAWMTRKS  
EETITPWNFEFVVDKGASAQSFIERMTNFDKNLPNEKVLPKHSLLYEYFTVYNELTKVKYVTEGMR  
KPAFLSGEQKKAIVDLLFKTNRKVTVKQLKEDYFKKIECFDSVEISGVEDRFNASLGTYHDLLKIIK  
DKDFLDNEENEDILEDIVLTLTLFEDREMIEERLKTYAHLFDDKVMKQLKRRRYTGWGRLSRKLIN  
GIRDKQSGKTILDFLKSDGFANRNFMQLIHDDSLTFKEDIQKAQVSGQGDSLHEHIANLAGSPAICK  
GILQTVKVVDELVKVMGRHKPENIVIEMARENQTTQKGQKNSRERMKRIIEGKELGSQILKEHPV  
ENTQLQNEKLYLYYLQNGRDMYVDQELDINRLSDYDVHDIVPQSFLKDDSIDNKVLTRSDKNRGK  
SDNVPSEEVVKMKKNYWRQLLNAKLITQRKFDNLTAKAERGGLSELDKAGFIKRQLVETRQITKHV  
AQILDSRMNTKYDENDKLIREVKVITLKSCLVSDFRKDFQFYKVREINNYHHAHDAYLNAVVGTA  
LIKKYPKLESEFVYGDYKVYDVRKMIKSEQEIGKATAKYFFYSNIMNFFKTEITLANGEIRKRPLIE  
TNGETGEIVWDKGRDFATVRKVLSPQVNVIVKKTEVQTGGFSKESILPKRNSDKLIARKKDWDPK  
KYGGFDSPTVAYSVLVAKVEKGKSKKLKSVKELLGITIMERSSSFENPIDFLEAKGYKEVKKDLII  
KLPKYSLFELENGRKRMLASAGELQKGNELALPSKYVNFLYLASHYEKLKKGSPEDNEQKQLFVEQ  
HKHYLDEIIEQISEFSKRVLADANLDKVLSAYNKHRDKPIREQAENIIHLFTLTNLGAPAAFKYFDT  
TIDRKRYTSTKEVLDTLIHQSIITGLYETRIDLSQLGGD

#### NLS Cas9 variants

(color shown as magenta for HA tag, green for His<sub>6</sub> tag and yellow for NLS sequence)

#### N0/C0 SpyCas9

[SpyCas9 Core Sequence]-GGSYPYDVPDYALEGGGSHHHHHH

#### N0/C1 SpyCas9

[SpyCas9 Core Sequence]-GGSYPYDVPDYA  
LEGGGRGGSPPKKRKYVGGSHHHHHH

#### N0/C2 SpyCas9

[SpyCas9 Core Sequence]-GGSYPYDVPDYALEGGGSPPKKRKYVGGRGGSPPKKRKYVGGSHHHHHH

### N0/C3 SpyCas9

[SpyCas9 Core Sequence]-

GGSSYPYDVDPDYALEGGGSPKKKRKVGGSPKKKRKVGGRGGSPPKKKRKVGGSHHHHHH

### N0/C4 SpyCas9

[SpyCas9 Core Sequence]-

GGSSYPYDVDPDYALEGGGSPKKKRKVGGSPKKKRKVGGSPKKKRKVGGRGGSPPKKKRKVGGSHHHHH

### N1/C0 SpyCas9

MGSSPPKKKRKVGGSTS-[SpyCas9 Core Sequence]-GGSSYPYDVDPDYALEGGGSHHHHHH

### N1/C1 SpyCas9 (Yellow, NLS; magenta, HA; green, His<sub>6</sub> tag)

MGSSPPKKKRKVGGSTS-[SpyCas9 Core Sequence]-

GGSSYPYDVDPDYALEGGGRGGSPPKKKRKVGGSHHHHHH

### N1/C2 SpyCas9

MGSSPPKKKRKVGGSTS-[SpyCas9 Core Sequence]-

GGSSYPYDVDPDYALEGGGSPKKKRKVGGRGGSPPKKKRKVGGSHHHHHH

### N1/C3 SpyCas9

MGSSPPKKKRKVGGSTS-[SpyCas9 Core Sequence]-

GGSSYPYDVDPDYALEGGGSPKKKRKVGGSPKKKRKVGGRGGSPPKKKRKVGGSHHHHHH

### N2/C0 SpyCas9

MGSSPPKKKRKVGGSTSPKKKRKVGGSS-[SpyCas9 Core Sequence]-

GGSSYPYDVDPDYALEGGGSHHHHHH

### N2/C1 SpyCas9

MGSSPPKKKRKVGGSTSPKKKRKVGGSS-[SpyCas9 Core Sequence]-

GGSSYPYDVDPDYALEGGGRGGSPPKKKRKVGGSHHHHHH

### N2/C2 SpyCas9

MGSSPPKKKRKVGGSTSPKKKRKVGGSS-[SpyCas9 Core Sequence]-

GGSSYPYDVDPDYALEGGSPKKKRKVGGRGGSPPKKKRKVGGSHHHHHH

### N3/C0 SpyCas9

MGSSPPKKKRKVGGSTSPKKKRKVGGSPKKKRKVGGSS-[SpyCas9 Core Sequence]-

GGSSYPYDVDPDYALEGGGSHHHHHH

### N3/C1 SpyCas9

MGSSPPKKKRKVGGSTSPKKKRKVGGSPKKKRKVGGSS-[SpyCas9 Core Sequence]-

GGSSYPYDVDPDYALEGGGRGGSPPKKKRKVGGSHHHHHH

## N4/C0 SpyCas9

MGSSPKKKRKVGGSTSPKKRKVGGSPKKRKVGGSPKKRKVGGSS-[SpyCas9 Core Sequence]-  
GGSYPYDVPDYALEGGGSHHHHHH
